# Supplementary material for: Development of a prediction model and estimation of cumulative risk for upper aerodigestive tract cancer on the basis of the aldehyde dehydrogenase 2 genotype and alcohol consumption in a Japanese population
Source: PubMed Central journal article supplement — Eur J Cancer Prev. 2016 Dec 7;26(1):38–47. doi: 10.1097/CEJ.0000000000000222 (PMC5142363; doi:10.1097/cej.0000000000000222), 2016-12-07
Supplement: cej-26-38-s001.pdf [file cej-26-38-s001.pdf]

(A) Head and neck cancer

(B) Head and neck cancer

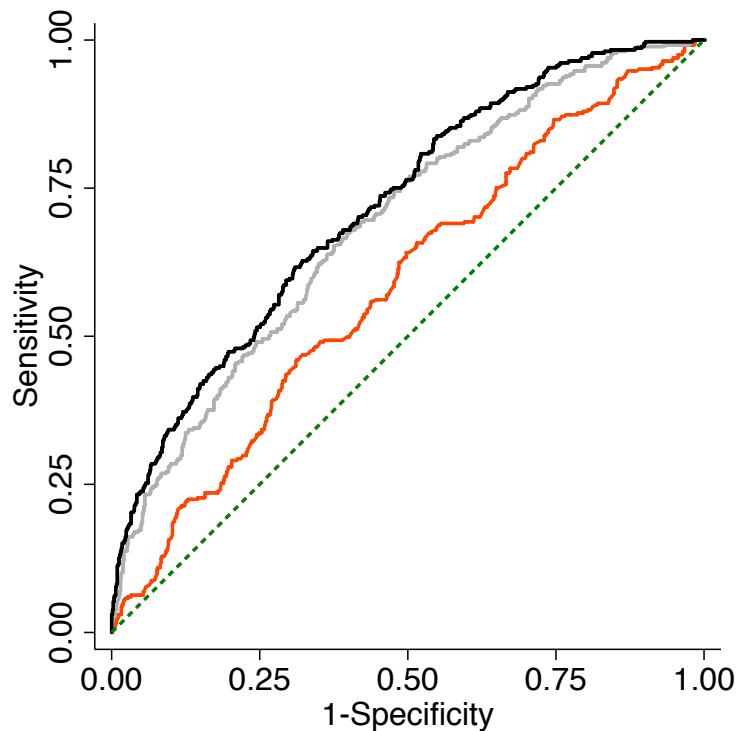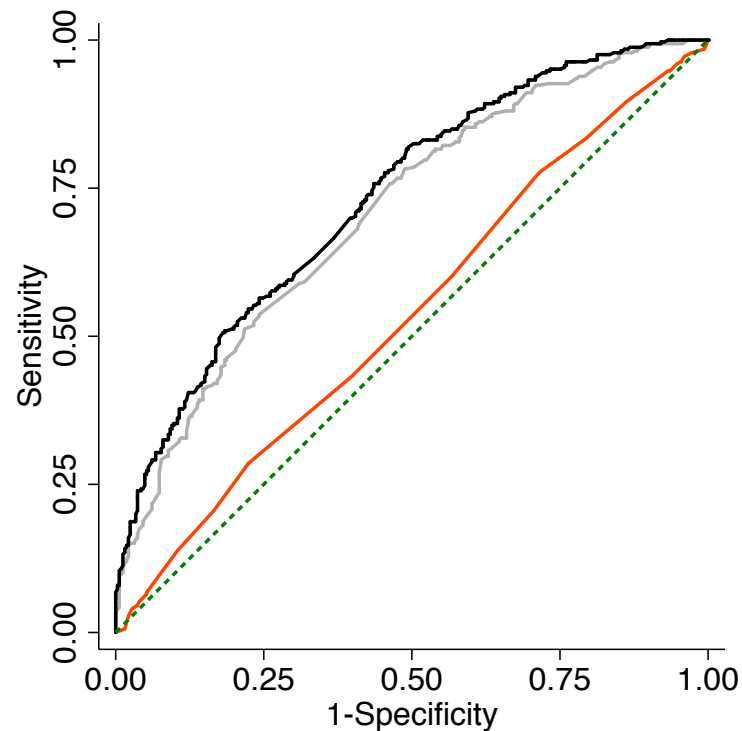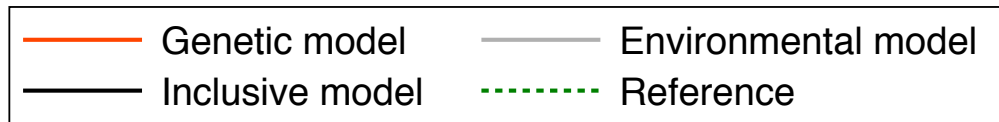

**Supplementary figure 1.** ROC curves in the three risk models in the derivation study (A) and the validation study (B). The straight dashed line with an AUC of 50% is reference. The upper black curved line represents the inclusive risk model, the gray line represents the environmental model, and the orange line represents the genetic model.

(A) Esophageal cancer

(B) Esophageal cancer

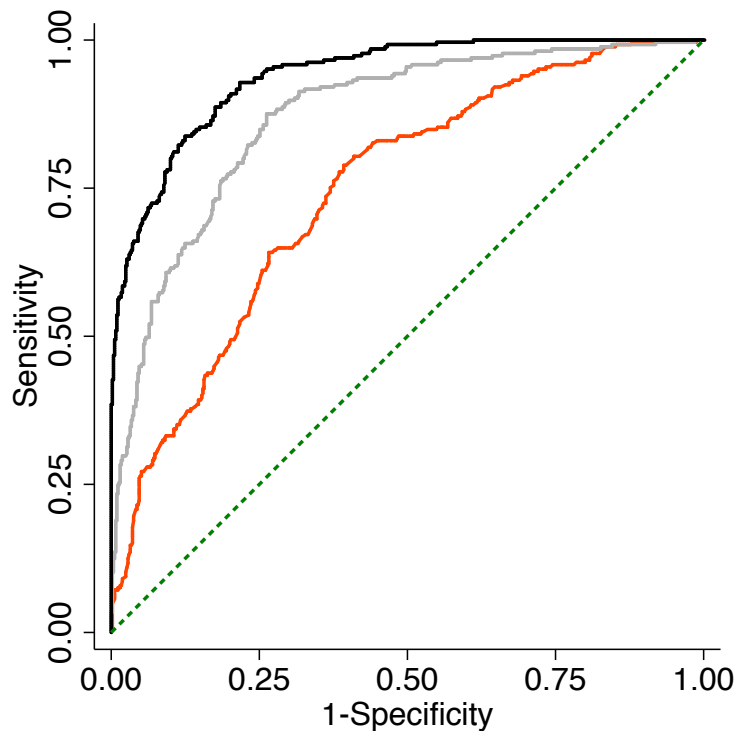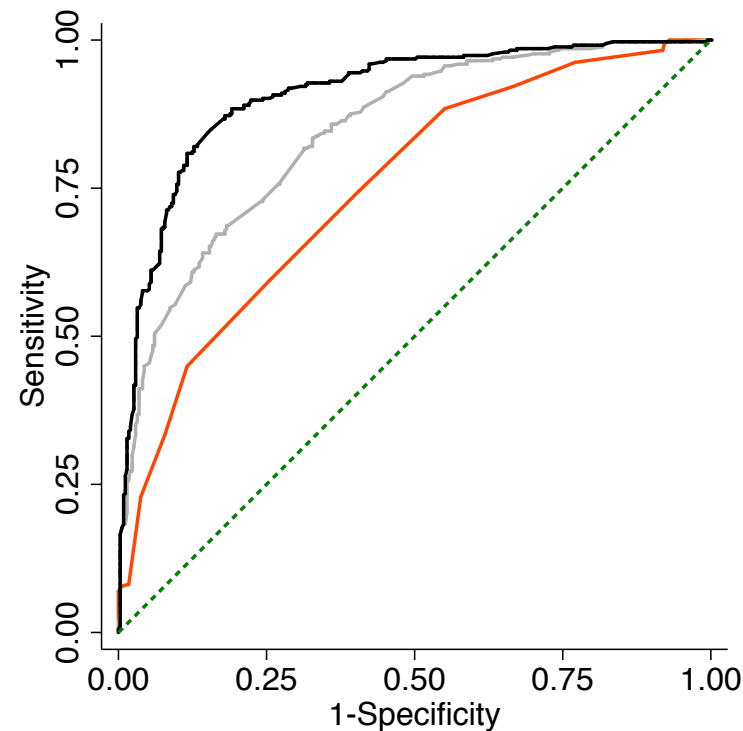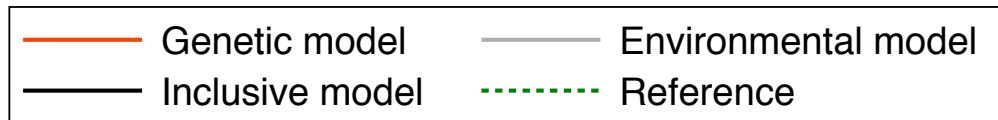

**Supplementary figure 1.** ROC curves in the three risk models in the derivation study (A) and the validation study (B). The straight dashed line with an AUC of 50% is reference. The upper black curved line represents the inclusive risk model, the gray line represents the environmental model, and the orange line represents the genetic model.
