# Supplementary material for: Development of a prediction model and estimation of cumulative risk for upper aerodigestive tract cancer on the basis of the aldehyde dehydrogenase 2 genotype and alcohol consumption in a Japanese population
Source: PubMed Central journal article supplement — Eur J Cancer Prev. 2016 Dec 7;26(1):38–47. doi: 10.1097/CEJ.0000000000000222 (PMC5142363; doi:10.1097/cej.0000000000000222), 2016-12-07
Supplement: cej-26-38-s002.pdf [file cej-26-38-s002.pdf]

(A) Head and neck cancer

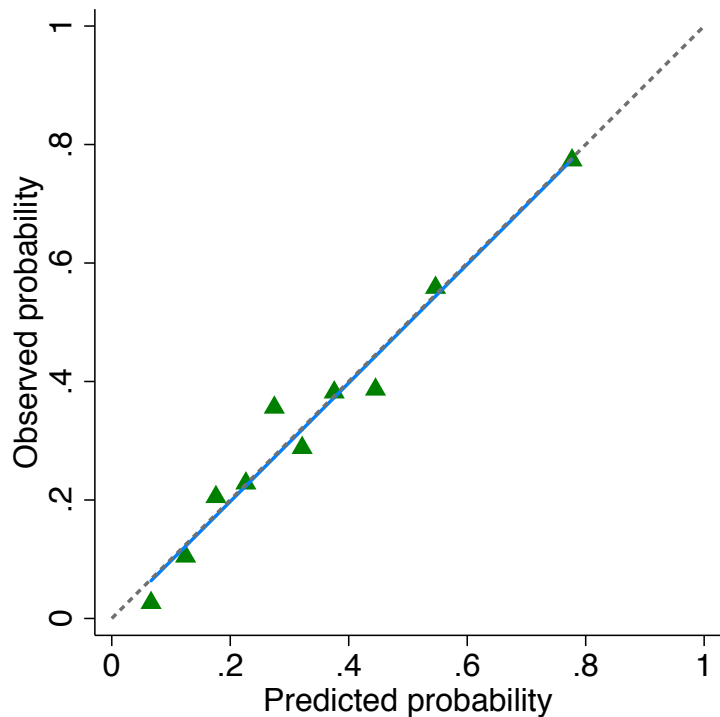

(B) Head and neck cancer

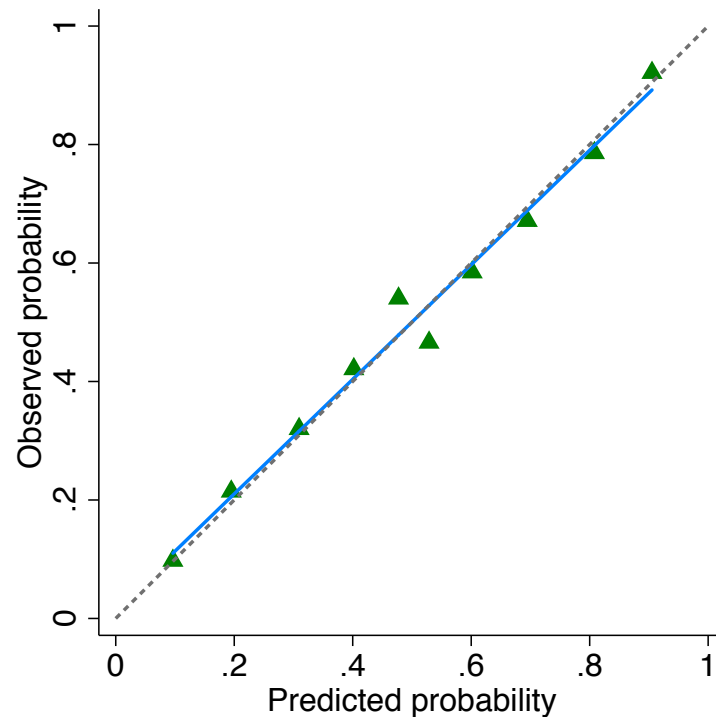

**Supplementary figure 2.** Calibration plots for the inclusive model by cancer site. Predicted and observed probabilities within deciles of predicted probability in the derivation study (A) and validation study (B). The straight dashed line (45° line) represents the ideal calibration line and the solid blue line is the linear calibration line for the risk model.

(A) Esophageal cancer

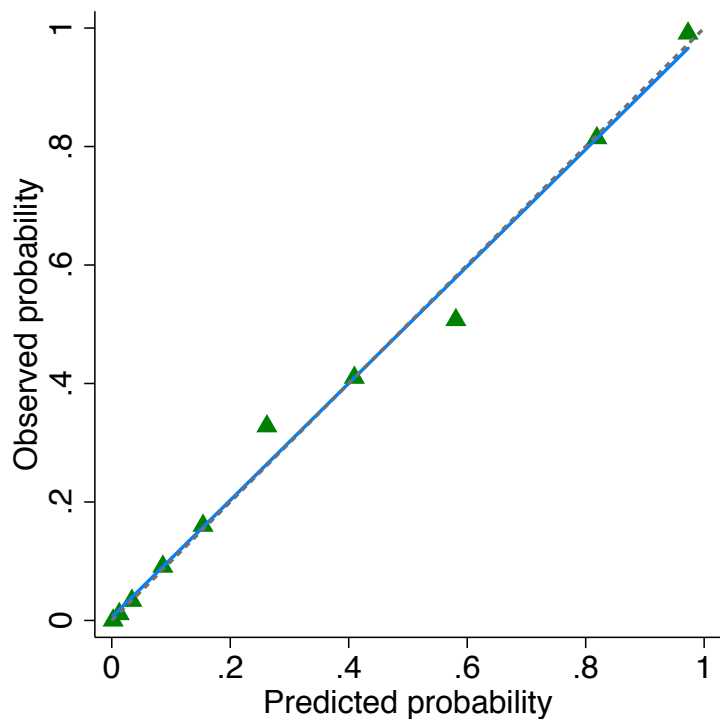

(B) Esophageal cancer

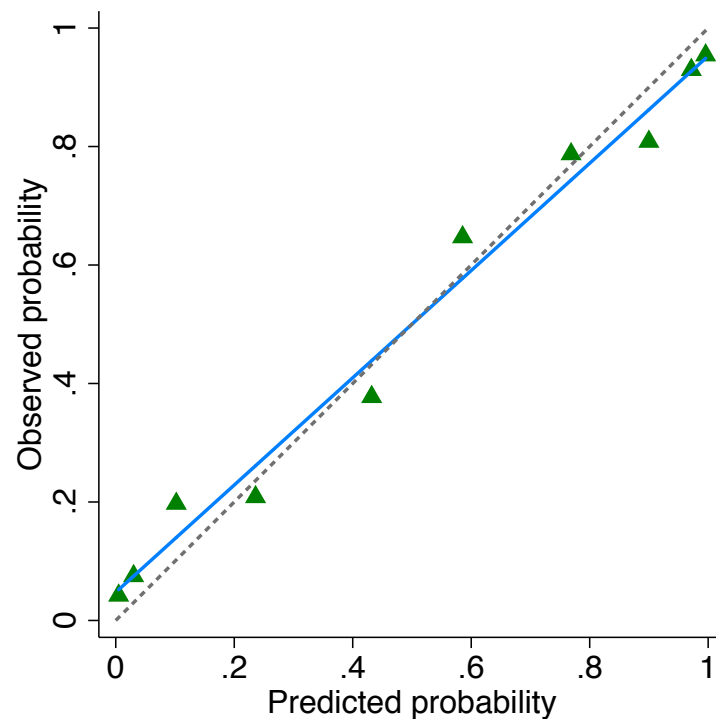

**Supplementary figure 2.** Calibration plots for the inclusive model by cancer site. Predicted and observed probabilities within deciles of predicted probability in the derivation study (A) and validation study (B). The straight dashed line (45° line) represents the ideal calibration line and the solid blue line is the linear calibration line for the risk model.
