# Supplementary material for: Development of a prediction model and estimation of cumulative risk for upper aerodigestive tract cancer on the basis of the aldehyde dehydrogenase 2 genotype and alcohol consumption in a Japanese population
Source: PubMed Central journal article supplement — Eur J Cancer Prev. 2016 Dec 7;26(1):38–47. doi: 10.1097/CEJ.0000000000000222 (PMC5142363; doi:10.1097/cej.0000000000000222), 2016-12-07
Supplement: cej-26-38-s003.pdf [file cej-26-38-s003.pdf]

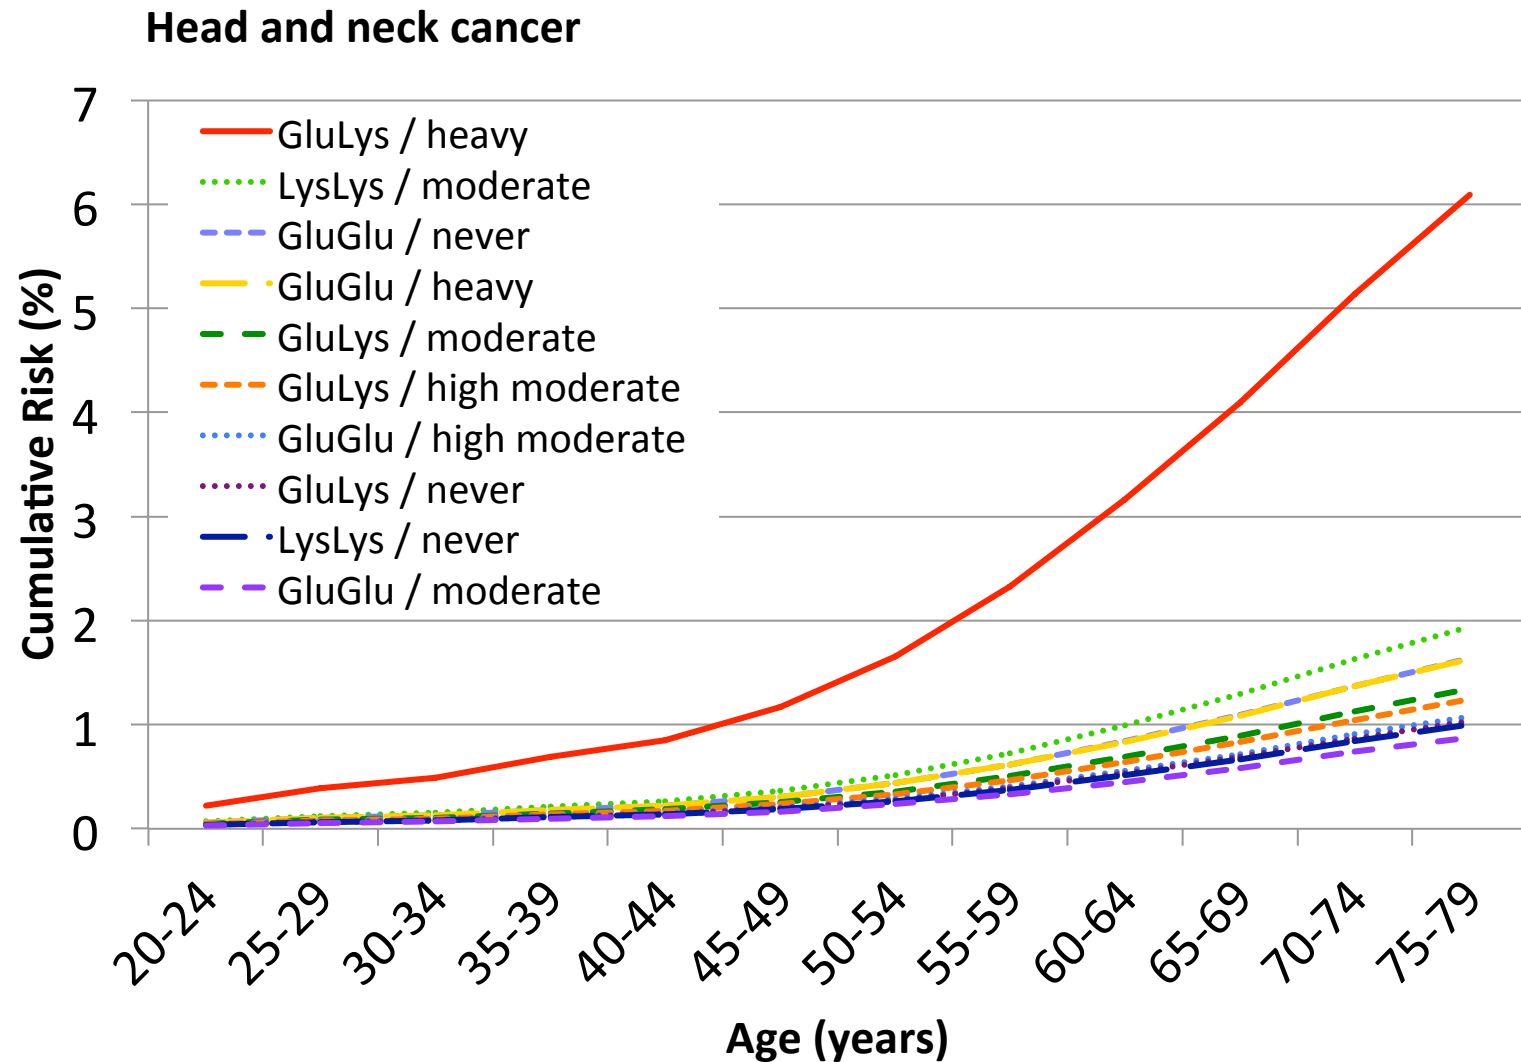

**Supplementary figure 3.** Cumulative risk (%) for each risk group (*ALDH2* genotype/alcohol consumption) at various ages up to age 80 years, estimated using the age-specific incidence rate and population size in 2007.

## Esophageal cancer

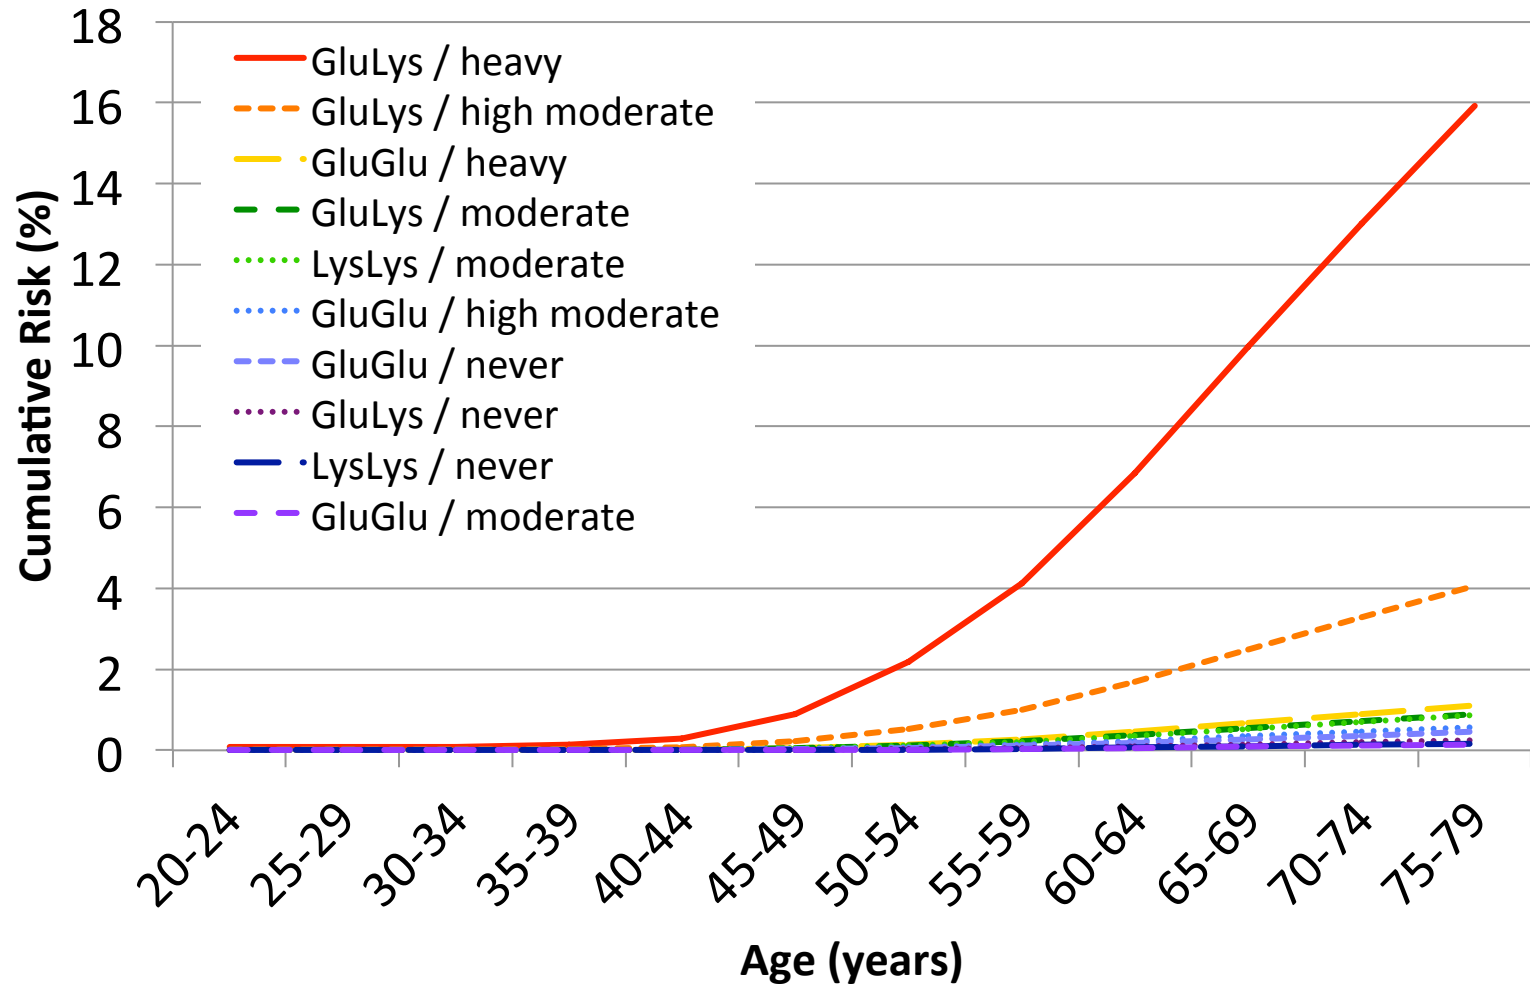

**Supplementary figure 3.** Cumulative risk (%) for each risk group (*ALDH2* genotype/alcohol consumption) at various ages up to age 80 years, estimated using the age-specific incidence rate and population size in 2007.
